# Supplementary material
Source: PubMed Central journal article supplement (PMC7449251)
Supplement: NIHMS1032050-supplement-Supplemental.pdf [file NIHMS1032050-supplement-Supplemental.pdf]

**Table 1.** Baseline characteristics of survey and interview samples.

| Characteristic                                           | Interview sample ( <i>N</i> = 44) |                  |
|----------------------------------------------------------|-----------------------------------|------------------|
|                                                          | <i>n</i>                          | (%) <sup>a</sup> |
| Race/ethnicity                                           |                                   |                  |
| African American                                         | 23                                | (52.3)           |
| White                                                    | 13                                | (29.5)           |
| Latino                                                   | 5                                 | (11.4)           |
| Other                                                    | 3                                 | (6.8)            |
| Age (years), mean ± SD                                   | 40.3 ± 9.8                        |                  |
| Sex                                                      |                                   |                  |
| Male                                                     | 36                                | (81.8)           |
| Female                                                   | 8                                 | (18.0)           |
| Have children                                            |                                   |                  |
| Yes                                                      | 35                                | (79.5)           |
| No                                                       | 9                                 | (20.5)           |
| Educational history                                      |                                   |                  |
| Some high school                                         | 13                                | (29.5)           |
| High school graduate                                     | 13                                | (29.5)           |
| GED                                                      | 10                                | (22.7)           |
| Some college                                             | 7                                 | (15.9)           |
| College graduate                                         | 1                                 | (2.3)            |
| Ever employed                                            | 43 (97.8)                         |                  |
| Employment since last criminal justice event             |                                   |                  |
| Yes                                                      | 8                                 | (18.1)           |
| No                                                       | 36                                | (81.8)           |
| Number of incarcerations, mean ± SD                      | 5.3 ± 4.3                         |                  |
| Years of most recent incarceration, mean ± SD            | 2.3 ± 3.52                        |                  |
| Released from prison during last year                    | 34                                | (75.6)           |
| Homeless since release                                   | 12                                | (26.7)           |
| Self-reported housing challenge due to criminal record   |                                   |                  |
| Unable to access subsidized housing                      | 9                                 | (20.5)           |
| Unable to stay with family/friends in subsidized housing | 10                                | (22.3)           |

<sup>a</sup>Percentages may not sum up to 100 due to rounding.

Table 1. Baseline characteristics of survey and interview samples.
